1 Title: **Mapping trait versus species turnover reveals spatiotemporal variation in functional**  
 2 **redundancy in a plant-pollinator network**

3 **Running title:** Spatiotemporal variation in functional redundancy

4 **Authors:** Aoife Cantwell-Jones<sup>1</sup>, Keith Larson<sup>2</sup>, Alan Ward<sup>1</sup>, Olivia K. Bates<sup>1</sup>, Tara Cox<sup>1</sup>, Frida  
 5 Brannlund<sup>2</sup>, Charlotte Gibbons<sup>1</sup>, Ryan Richardson<sup>1</sup>, Jason M. Tylianakis<sup>3</sup>, Jacob Johansson<sup>4</sup> & Richard  
 6 J. Gill<sup>1</sup>

7 **Contributions:**

8 ACJ, AW & RJG conceived the idea; KL initiated the phenology project; KL, OKB, TC & RJG set up the  
 9 permanent study site and developed the research goals; KL, OKB, TC, FB, CG, RR & RJG performed  
 10 the fieldwork; ACJ, AW & RJG developed the analytical approach, with feedback from JT and JJ; ACJ  
 11 performed the analyses with input from AW & RJG; ACJ & RJG wrote the manuscript, with feedback  
 12 from KL, JT & JJ.

13 **Addresses:**

14 1. Georgina Mace Centre for The Living Planet, Department of Life Sciences, Silwood Park, Imperial  
 15 College London, SL5 7PY, UK

16 2. Climate Impacts Research Centre, Department of Ecology and Environmental Sciences, Umeå  
 17 University, 90187 Umeå, Sweden.

18 3. Bioprotection Aotearoa, School of Biological Sciences, Private Bag 4800, University of Canterbury,  
 19 Christchurch 8041, New Zealand

20 4. Department of Biology, Lund University, Lund, Sweden

21 **Keywords:** Arctic, bumblebees, *Bombus* community, altitudinal gradient, thermal cline, sequential  
 22 extinction, connectance, modularity

23 **Article type:** Letter

## 24 **Acknowledgements**

25 ACJ is funded by the NERC Science and Solutions for a Changing Planet doctoral training programme,  
 26 Imperial College London. JMT is funded by the Marsden Fund (Grant number: UOC1705). The project  
 27 was also supported by an INTERACT grant (funded by H2020 - agreement no. 730938) awarded to  
 28 RJG. We would like to thank J. Gustafsson for help with plant identification, H. Rosenzweig for help  
 29 setting up the sampling plots, and the Climate Impact Research Centre (CIRC, Umeå University) &  
 30 Abisko Scientific Research Station (ANS) for field equipment and their continued support.

31 **Competing interests:** The authors declare no competing interests.

32 **Data statement:** All data used in this study will be uploaded to the Dryad Digital Repository on  
 33 acceptance.

## 34 **Word count:**

35 Abstract: 150 words

36 Main: 5,000 words

37 Figures: 5

38 Tables & Boxes: 0

39 References: 103

40     **ABSTRACT:**

41     Functional overlap between species (redundancy) shapes competitive and mutualistic interactions,  
42     determining community responses to perturbations. Most studies view functional redundancy as  
43     static, even though individuals within species vary in traits over seasonal or spatial gradients.  
44     Consequently, we lack knowledge on trait turnover within species, how functional redundancy  
45     spatiotemporally varies, and when and where interaction networks are vulnerable to functional loss.  
46     Studying an Arctic bumblebee community, we investigated how body-size turnover over elevation  
47     and season shapes their host-plant interactions, and test how sensitive networks are to sequentially  
48     losing body-size groups. With trait turnover being larger than species, we found: i) late-season  
49     networks were less specialised when nodes comprised functionally similar bumblebees; ii) removal  
50     of bumblebee-body-size groups over species accelerated coextinction of host plants, with the  
51     magnitude varying in space and time. We demonstrate functional redundancy can vary  
52     spatiotemporally, and functional loss impacts interaction partners more than expected from species  
53     loss alone.

54

## 55 1. INTRODUCTION

56 Understanding the processes structuring communities over environmental gradients is central to  
 57 determining how they will respond to environmental change (Pellissier *et al.*, 2018; Orr *et al.*, 2021).  
 58 In particular, our ability to predict how organisms interact through trophic, mutualist or competitive  
 59 processes depends on being able to map how functional traits vary in space and time, both within  
 60 and between species (Gray *et al.*, 2018; Gravel *et al.*, 2019; Gómez *et al.*, 2020; Hurtado *et al.*, 2020).  
 61 While key life-history traits directly determine inter- or conspecific relationships and the distribution  
 62 of individuals, such traits are also simultaneously being selected and filtered by the environment  
 63 (Gillespie *et al.*, 2017; Bladon *et al.*, 2020). Consequently, the frequency distributions of traits within  
 64 populations can vary across environmental gradients and over seasons (Jourdan *et al.*, 2016; Boyle *et al.*,  
 65 2020; Taylor-Cox *et al.*, 2020; Gutiérrez & Wilson, 2021). Yet how population-level responses  
 66 combine to influence community trait-composition, and subsequently how spatiotemporal trait  
 67 turnover feeds back to shape community interactions, remain poorly understood (Ings *et al.*, 2009;  
 68 Tylianakis & Morris, 2017; Peralta *et al.*, 2020).

69 For insect pollinators, how functional traits are spatiotemporally distributed likely determines the  
 70 occurrence of interactions with mutualistic host plants (Bewick *et al.*, 2013; Brosi & Briggs, 2013),  
 71 with compatibility between pollinator traits and plant hosts mediating interaction strengths  
 72 (Bartomeus *et al.*, 2016; Peralta *et al.*, 2020). Investigating the dynamics of plant-pollinator  
 73 relationships, however, has often been based on network comparisons between sites separated by  
 74 large geographic distances or between years (Dupont *et al.*, 2009; Cirtwill *et al.*, 2018; Bascompte *et al.*,  
 75 2019). This is despite individual interactions likely happening over distances of typically just  
 76 hundreds of meters and over weekly (even daily) timeframes. Consequently, our understanding of  
 77 plant-pollinator network lability at localised geographical scales and over short time frames remains  
 78 limited. We must thus move beyond viewing plant-pollinator networks as geographically or  
 79 seasonally static entities (Trøjelsgaard & Olesen, 2016; Tylianakis & Morris, 2017; Bramon Mora *et al.*

80 *al.*, 2020), and understand how species versus functional traits spatiotemporally turn over in  
81 localised communities (Robroek *et al.*, 2017). In doing so, we can resolve the contribution of  
82 functional traits to network structure and robustness to perturbation. With trait variation  
83 responding to many environmental factors, studies mapping the distribution of trait variability can  
84 more accurately reveal how environmental change can shape and potentially threaten plant-  
85 pollinator interactions.

86 Bipartite networks can investigate how pollinator communities interact with their host plants by  
87 aggregating individuals into nodes (Ings *et al.*, 2009; Poisot, Stouffer & Kéfi, 2016). In the past, nodes  
88 typically represented taxonomic units (Bascompte & Jordano, 2007), but more recently functional  
89 traits have been incorporated into networks by assigning each species (node) a mean value of a  
90 given trait from a set of sampled individuals (e.g. Bartomeus, 2013; Coux *et al.*, 2016; Dehling *et al.*,  
91 2016). This assumes however that all individuals within each node are functionally equivalent and  
92 overlap in trait values between species is low – which is rarely the case (Gentile *et al.*, 2021).

93 Network structure changes markedly when individuals rather than species are treated as nodes (Tur  
94 *et al.*, 2014), with intraspecific trait variation potentially being as large as interspecific (Des Roches *et*  
95 *al.*, 2018), arising through sexual dimorphism (Bolnick *et al.*, 2011), conditions during development  
96 (Fenberg *et al.*, 2016) and adaptation to environmental gradients (Hurtado *et al.*, 2020; Taylor-Cox *et*  
97 *al.*, 2020). Additionally, temporal intraspecific variation can result from phenological variation with  
98 members of a species emerging at different times (Dongmo *et al.*, 2018; Fric & Konvicka, 2002).

99 Thus, to assess how functional trait turnover determines plant-pollinator network dynamics, we  
100 must scale down to the functional traits of individuals within populations, to disentangle how traits  
101 shape networks (e.g. Dupont *et al.*, 2014; Kuppler *et al.*, 2016; Rumeu *et al.*, 2018). To our  
102 knowledge, however, data on individual traits and interactions at such fine spatiotemporal scales are  
103 generally lacking. Moreover, there are few empirical studies that incorporate intraspecific trait  
104 variation when studying functional contribution to plant-pollinator network structure (but see  
105 Dupont *et al.*, 2014; Classen *et al.*, 2017).

Here, we explore how individual variability in traits and interactions contribute to spatiotemporal dynamics in pollination network structure along an environmental gradient. We hypothesise: (1) intraspecific trait variability will be sufficiently large that functional turnover in space and time will exceed species turnover; (2) interaction networks where pollinator individuals are grouped together into nodes based on their traits, rather than species identity, will better capture interacting guilds of individuals. Subsequently, functional nodes will interact with a limited set of trait-matched plants to generate more-modular and less-connected networks, relative to taxonomic nodes; (3) loss of pollinator functional nodes will result in greater extinction cascades of host plants than species nodes. Addressing this latter hypothesis will test the degree to which individual functional trait redundancy can provide network robustness to pollinator species loss, and how dependent this is in space and time.

We test these hypotheses in a montane Arctic community of bumblebees, using bumblebee-plant visitation data collected repeatedly along an elevational transect (33 days) over a 57-day period. This temporal and elevational cline allowed us to map plant-bumblebee interaction and trait turnover in space and time. We focus on body size, as it is influenced by thermal conditions during development, and determines foraging capabilities at low and high relative temperatures (Lundberg & Ranta, 1980; Greenleaf *et al.*, 2007). Body size also strongly correlates with proboscis length (influencing floral compatibility; Cariveau *et al.*, 2016) and can predict pollinator-plant interactions (Eklöf *et al.*, 2013; Klumpers *et al.*, 2019). Additionally, as with many functionally important species, bumblebee body size at the population level does not remain constant through the season, as earlier emerging individuals have larger bodies (queens) than later emerging individuals (workers).

## 2. METHODS

### 2.1 Study site

We collected data along an elevational transect (420-1164 m.a.s.l.; est. 1917; Fries, 1925; MacDougall *et al.*, 2021) on the eastern slope of Mt Nuolja in Abisko National Park, Sweden (68° 22' N, 18° 47' E). Along the 3.4 km transect, there are 13 permanent plots measuring 45 × 45 m, within which we recorded bumblebee activity (Fig. 1 & S1; SI 1). Five relatively distinct vegetational zones (Fig. 1 & S2; Table S1) are found along this transect and following Lundberg & Ranta (1980) can be described as: A) old Birch forest (420-550 m;  $n = 3$  plots); B) young, newly established Birch forest (550-650 m;  $n = 2$ ); C) shrub Willow (650-850 m;  $n = 3$ ); D) herbaceous meadow (850-1050 m;  $n = 2$ ); E) Arctic dwarf shrub and heath (1050-1164 m;  $n = 3$ ). The number of plots ( $n = 13$ ) was determined by the feasibility under which sampling could take place, dependent on both the terrain and number of observations that could be achieved in one day.

## 2.2 Field observations and body size measurements

We conducted observations between 24<sup>th</sup> May to 20<sup>th</sup> July 2018, weather permitting. We typically conducted a “survey” – defined as undertaking bumblebee observations for all 13 plots over a two-day period (intended to be two consecutive days) – twice per week (Table S1). We observed each plot for a standardised 20 minutes between 08:00 - 19:00. For each survey, we randomised the time of day the plot was sampled (SI 2 for further details).

We recorded all bumblebees observed flying through or foraging inside the plot ( $n = 1,582$ ), but only included those that were confidently identified taxonomically in the analyses (13 species;  $n = 1,047$  individuals). If the bee was foraging on a flower, we recorded the plant species ( $n = 31$ ; Table S2). We attempted to catch all observed bees with a butterfly net (45 cm diameter), and, if successful, transferred them ( $n = 709$ ) into separate lidded, plastic holding pots (150 mL volume) and placed them in a dark insulated bag. At the end of the observation period, we transferred each bee in order of capture to a marking cage and took a top-down dorsal image using a digital camera (Canon SX720 HS) once the bee was still (e.g. Fig 1, inset B). From the images, we: i) confirmed species identification (consistent with Söderström (2017)), although *Bombus polaris* and *B. alpinus* were

indistinguishable (Williams *et al.*, 2015) and therefore grouped as a species aggregate; ii) measured the intertegular distance (ITD; distance between left and right forewing attachment points, which is an accurate proxy for body mass (Cane, 1987) and proboscis length (Cariveau *et al.*, 2016)), by digitally landmarking each tegulum using TPS software (tpsDig v.2.3.2 & tpsUtil v. 3.2; Rohlf, 2015) and exporting the landmarks to the geomorph package in R to calculate scaled distance in millimetres (Adams *et al.*, 2020). Of the bees with ITD measurements, we observed 69.8% ( $n = 495$ ) foraging on a flower, and these comprised 94 queens, 270 workers, 21 drones, and 110 females where caste could not be confidently assigned (Table S3-5; SI 3).

### 2.3 Assessing intra- and interspecific variation in bumblebee body size

To gauge the magnitude of intraspecific variation in body size, we quantified the degree of overlap in ITD distributions between species by calculating the “coefficient of overlapping” (Ridout & Linkie, 2009) of pairwise bumblebee species kernel density estimates using the *overlapTrue* function of the “overlap” package (Meredith & Ridout, 2020). Output values range between zero and one, with one representing complete ITD distribution overlap between species. We only included species with  $\geq 10$  individuals that had ITD measured, yielding 45 species pairwise combinations. Additionally, we performed a mixed-effects ANOVA to test whether bumblebee species identity could significantly predict mean differences in ITD. Caste was nested within species included as random intercepts, to ensure that differences between species were not due to one species containing more of a given caste.

To analyse how ITD varied in space and time at the community level, we first fitted ordinary least squares models, with time expressed as calendar date, and altitude as the mean elevation of each sampling plot. Then, to assess if species responded similarly across time and space, we fitted mixed-effects models (using the “lme4” package; Bates *et al.*, 2018) and included species as random intercepts with random slopes (either calendar date or mean elevation, respectively). We used



likelihood ratio tests (LRT) to determine whether including random intercepts or slopes improved model fit.

## 2.5 Assigning individuals to functional groups

We created individual trait-based functional groups following the method of Rumeu *et al.* (2018), by aggregating individual bees based upon similarities in ITD and ignoring species identity (using the “cluster” package; Maechler *et al.*, 2014). When clustering, we only included flower-visiting bees that had ITD measurements ( $n = 495$ ; as we use these clusters in later analyses of plant-bumblebee visitation networks) and performed it on the pooled set of observations across the spatiotemporal gradient. We “constrained” the number of functional groups to match the total number of species present, to enable comparisons without confounding effects of changing number of nodes (Rumeu *et al.*, 2018). The resulting 13 functional groups varied in abundance and ITD range (Fig. S3; Table S6) and were numbered in order of increasing body size (i.e. Constrained (C) 01 contained the smallest-bodied individuals).

## 2.6 Assessing spatiotemporal changes in species and functional-trait composition

To investigate spatial variation in the bumblebee community, we grouped plots from vegetation types A and B to represent a “low-elevation” dataset, and plots from vegetation types C, D and E, a “high-elevation” dataset. Pooling data across multiple plots was done to ensure sufficient sample size for our analyses across each point in space and time. Within each spatially pooled set of observations, we split observations into an “early” and “late” part of the season. To guide this split we considered colony-lifecycle phenology of the social bumblebees (queens emerge and dominate during the early season and workers during the late) to be natural stages of comparison to look at temporal functional turnover and determined the cut-off between “early” and “late” as occurring when 50% of observed female bees were likely to be queens (23<sup>rd</sup> June 2018; Table S7; Fig. S4; SI 4).

We estimated spatiotemporal turnover in the taxonomic and functional composition of communities using Bray-Curtis distance matrices (using the “betapart” package; Baselga *et al.*, 2018), which are robust to under-sampling and taxonomic misidentification (Schroeder & Jenkins, 2018). We also decomposed the Bray-Curtis distances into their two additive components (sensu Baselga, 2013). Bray-Curtis distances range from zero to one, with one representing complete community turnover. To ensure the robustness of our results, we additionally computed Jaccard distances with a presence-absence version of the community data (using “vegan” package; Oksanen *et al.*, 2007), the results of which can be found in the supplementary.

## 2.7 Comparing network architecture between species- and functional-group-based networks

We constructed two types of weighted networks from the same observed interaction data using the “bipartite” package (Dormann *et al.*, 2009): 1) using species identity as nodes, 2) using functional group identity as nodes (see 2.5). We described each network using: the number of bumblebee nodes (taxonomic or functional groups) (B) and plant species (P); and the total number of observed interactions (I). To investigate whether the functional-group-based networks better capture trait matching, we additionally calculated: *Weighted connectance* (herein, connectance; e.g. Kaiser-Bunbury *et al.*, 2011) to reflect the proportion of realised links in the network out of all possible links (i.e.  $\frac{I}{P \times B}$ ), ranging between zero (unconnected network, suggesting many specialised interactions) and one (completely connected network); and *Weighted quantitative modularity* Q (herein, modularity; Beckett, 2016) to describe the presence of distinct, highly connected subnetworks. Modularity was calculated using the DIRTLP+ algorithm (Beckett, 2016) and ranges from zero (the network does not have more links within subnetworks – modules – than expected by chance) to one (all links are within modules; highly modular network).

To assess whether the observed interaction networks were significantly less connected or more modular than expected, we standardised raw values using the mean and standard deviation of indices calculated from 999 null networks (z-scores). We generated these null networks using the

*vaznull* algorithm (Vázquez *et al.*, 2007) from the “bipartite” package (Dormann *et al.*, 2009). These z-scores enabled us to estimate the likelihood, as *p*-values, of the observed network architectures emerging from random associations.

## 2.8 Using stepwise extinctions to compare network robustness between species- and functional-group-based networks

Through a randomised removal and iteration process we investigated the relative contribution of taxonomic and functional loss towards the rate of network collapse, based on the principle that interaction losses lead to subsequent host-plant extinctions. Here, an extinction occurred when a node had zero links remaining, with the assumption that no interaction rewiring occurred after extinction. By comparing the differential rate of network collapse under functional vs. taxonomic loss, we can investigate which poses a greater threat to plant-pollinator interactions under environmental change, and whether this depends on the spatiotemporal context. We utilised a novel method of stepwise extinction that focuses on the frequency distribution of ITD within species. We removed one discrete portion of a node, where, for the species-based networks, we removed a functional group from a node (e.g. all individuals with ITD 4.04-4.52 mm being removed from *B. jonellus*), and, for the functional-group-based networks, we removed a species from a node (e.g. *B. alpinus/polaris* was removed from the node containing individuals with 7.71-7.95 mm ITDs). We performed this removal randomly until one of the trophic levels (plant or bumblebee) had only one node remaining. For example, during the late season at low elevation, there are 37 unique species × functional group combinations (number of functional groups within species, or vice versa), meaning a maximum of 37 removals could occur. After each removal, we measured the number of remaining flower species, (weighted) connectance and (weighted quantitative) modularity – we used the rate of change in these metrics as proxies of network robustness. We iterated the process of randomised removal and calculation of indices 1,000 times and performed it separately for each point in space and time.

Using the results from the iterations, we modelled the change in each measure of network robustness as a function of the number of “items” (viz. discrete portions within nodes) that had been removed from each network, using generalised least squares models (glms; from “nlme” package; Pinheiro *et al.*, 2017). Models took either linear or quadratic form, depending on the  $R^2$  value. To account for increasing variance of model residuals when items were removed, we included an exponent-of-the-variance covariate. Due to issues with model convergence, we were unable to account for increasing model-residual variance for modularity, so these results have been placed in the supplementary materials, and should be interpreted with caution. To assess and compare levels of “network robustness”, we looked at two aspects: i) differences in the shape of the plotted line estimates; ii) area under each curve (AUC) per model (“DescTools” package; Signorell, 2021). We standardised by dividing the raw AUC value by the product of the number of items removed (as some points in space and time contained more functional groups and species) and the maximum value of the calculated index. For the number of remaining plant species, if loss of functional groups has a larger effect than loss of species, we should expect functional-group networks to show lower standardised AUC, as it indicates that fewer individuals have to be removed from the network before its structure collapses. Alternatively, for weighted connectance, a higher AUC when removing functional groups would suggest the network requires fewer individuals to be removed for specialised interactions to be lost (i.e. before it becomes fully connected).

We performed all analyses using R (v. 4.0.2; R Core Team, 2020).

### 3. RESULTS

#### 3.1 How do functional groups and species turn over in space and time?

Bee species identity did not significantly predict ITD (mixed-effects ANOVA:  $F = 0.36$ ,  $p = 0.97$ ; Table S8), with the 13 species showing considerable overlap in ITD distributions (Fig. S5). While bumblebee

ITD ranged from 3.21 to 9.43 mm, 80% of the pairwise species comparisons ( $n = 45$ ) showed overlapping ITD kernel density estimates of  $\geq 0.5$ , and 11% showed  $\geq 0.75$  (Table S9). *B. jonellus* and *B. pratorum*, however, frequently deviated from this trend, each constituting four (of nine) pairwise comparisons with  $< 0.5$  overlap.

At the community level, mean ITD significantly decreased over the season (lme:  $-0.0491 \text{ mm day}^{-1} \pm 0.00251$ ,  $t = -19.6$ ,  $p < 0.001$ ;  $N = 709$ ; Fig. 2; Table S10-12) and was consistent across bumblebee species (likelihood ratio tests (LRT) supporting species having random intercepts (LRT:  $p < 0.001$ ), but not random slopes (LRT:  $p = 1$ ) for the effect of season). ITD also significantly increased with elevation (lm:  $0.121 \text{ mm } 100 \text{ m}^{-1} \pm 0.0279$ ,  $t = 4.33$ ,  $p < 0.001$ ;  $N = 709$ ; Fig. 2; Table S13), with species having different intercepts (LRT:  $p < 0.001$ ; Table S14-15) but similar slopes (LRT:  $p = 0.195$ ).

### 3.1.2 Changes in species versus functional composition in the community

Species turnover was similar in time and space (Bray-Curtis distance ( $D_{BC}$ ): 0.474-0.672 & 0.322-0.781, respectively; Fig. 3; see Table S16-18 for breakdown in the additive components of  $D_{BC}$  and Jaccard dissimilarity). Functional turnover, however, was larger than species turnover (mean  $D_{BC} \pm$  standard error:  $0.651 \pm 0.099$  vs.  $0.537 \pm 0.068$ , respectively; Table S17). As suggested by 3.1.1 and Fig. 2, functional turnover was also greater over the season than with elevation ( $D_{BC}$ : 0.776-0.792 & 0.269-0.500, respectively). Over the season, we saw an increased relative abundance of functional groups containing smaller individuals: C02 (mean ITD = 3.82 mm), C03 (4.27 mm) and C04 (4.71 mm), and decrease in the larger-bodied functional groups: C07 (6.23 mm) and C08 (6.69 mm). With elevation, groups C09 (7.22 mm) and C10 (7.81 mm) increased in relative abundance, while instead C03 decreased.

### 3.2 Differences in architecture between species and functional networks over space and time

Connectance and modularity differed in the two network types across space and time (Fig. 4), with networks in the late season being significantly less connected and more modular than expected

under the null distribution (species (s): late season, low elevation connectance:  $z = -3.82$ ,  $p = <0.001$ , modularity:  $z = 5.17$ ,  $p < 0.001$ ; late, high connectance:  $z = -2.02$ ,  $p = 0.043$ , modularity =  $z = 4.98$ ,  $p < 0.001$ ; functional (f): late, high connectance:  $z = -3.04$ ,  $p = 0.002$ ; Table S19). During the late season, species-based networks were also consistently more modular than functional-group-based networks (low:  $s = 0.241$ ,  $f = 0.136$ ; high:  $s = 0.334$ ,  $f = 0.245$ ), although both showed similar levels of connectance (Table S19).

### *3.3 Differences in robustness between species and functional networks over space and time*

For the stepwise removal analysis, removing functional groups from species nodes always led to faster extinction of flower species ( $f = 0.738$ - $0.828$ ,  $s = 0.765$ - $0.838$ ; Fig. 5A; Tables S20-21) than removal of bumblebee species. For flower species, this difference was most pronounced during the early season at high elevation, in which removing species from functional-group nodes showed a convex decline in number of flower species remaining, whereas removing functional groups from species nodes had a linear decline (AUCs:  $0.800$  vs.  $0.738$ , respectively). For connectance, the differential rates at which the networks became fully connected under functional vs. taxonomic loss was spatiotemporally dependent. For example, at low elevation, and at high elevation during the early season, removing species from functional group nodes led to a faster loss of specialised interactions than removing functional groups from species nodes (i.e. higher standardised AUCs reflecting a more rapid increase in connectance; Fig. 5B; AUC range:  $0.751$ - $0.888$  vs.  $0.732$ - $0.885$ , respectively). In contrast, at high elevation during the late season, this trend was reversed, with functional loss leading to a faster decline in specialised interactions ( $0.692$  vs.  $0.764$ , respectively).

## **4. DISCUSSION**

### *4.1 Mapping spatiotemporal trait change reveals decoupling of functional and species turnover*

When considering the bumblebee community as a static entity, most bumblebee species overlapped in body size suggesting high functional redundancy. Species identity was thus a poor surrogate for individual trait variation. Additionally, body size within a species varied in space and time, such that functional turnover as the season progressed was far larger relative species turnover. While body size turnover in time is somewhat expected in bumblebees (large queens followed by smaller workers), we also found functional turnover in space, which again exceeded species turnover, particularly early in the season. This decoupling of species identities and their mean traits (Robroek *et al.*, 2017) highlights why overlooking the spatiotemporal dynamics of networks, as well as assigning mean trait values to species, may poorly explain functional outcomes such as trait compatibility and resource acquisition (Rumeu *et al.*, 2018; Wong & Carmona, 2021).

Spatial turnover being greater in functional than in taxonomic communities suggests that, while species adaptations may have contributed to higher altitude distributions (larger bodied species found at higher elevations, particularly in early season), intraspecific variation in body size still mediated where bees could be found. Smaller bees of any species were filtered from the community at high altitude (also see McCabe *et al.*, 2019). This likely represents a plastic response at the colony level (Classen *et al.*, 2017), where larger individuals within a species are able to forage at higher elevation, due to being better able to thermoregulate (Heinrich, 1975) and fly at lower temperatures (Kenna *et al.*, 2021).

Temporal functional turnover being independent from species identity is not exclusive to bumblebees (Fukami *et al.*, 2005; Classen *et al.*, 2017; Robroek *et al.*, 2017; Gómez *et al.*, 2020), although the degree of such decoupling may vary across organisms. Yet, surprisingly little work has been done on mapping temporal trait distributions, especially at the spatiotemporal resolution or across a large community that we cover (but see Classen *et al.*, 2017). Further, our study is one of the first to associate such a trait distribution with a key functional role – floral visitation as a proxy for pollination service (but see Ranta & Lundberg, 1981; Miller-Struttmann & Galen, 2014; Classen *et*

*al.*, 2017). Studies should therefore benefit from considering species as nested within a functional continuum, rather than as distinct units in terms of their traits (Bolnick *et al.*, 2011; Siefert *et al.*, 2015; Des Roches *et al.*, 2018).

#### 4.2 Architecture of functional interactions varied in space and time

Our plant-bumblebee interaction networks varied architecturally across space and time, contrasting with previously studied networks that showed relatively stable macroscopic features (e.g. connectance) across space (at local and regional scales) and over time (within seasons and across years; Olesen *et al.*, 2008; Dupont *et al.*, 2009; Trøjelsgaard & Olesen, 2016; Tylianakis & Morris, 2017). We found modularity to increase and connectance to decrease as the season progressed. This was associated with an increase in bumblebee abundance and plant species richness, which could have led to greater competition between bumblebee species promoting more specialised host-plant interactions (Brosi & Briggs, 2013; Miller-Struttmann & Galen, 2014). This is consistent with ecological character-displacement theory, in which competition leads to niche divergence in sympatric species; (Germain *et al.*, 2018; Egas *et al.*, 2005). Alternatively, other temporal changes in our studied plant-pollinator community in association with abiotic factors, like increasing mean daily temperatures, may have contributed. For example, Ohler *et al.* (2020) observed that microclimatic variation in temperature (of soils) was positively related to plant productivity and plant-visitor richness, and subsequently changes in network architecture. But ultimately, our findings underline how any static perspective of plant-pollinator interactions will miss nuanced but fundamental properties of how species spatiotemporally interact.

Functional over taxonomic networks being more connected and less modular later in the season was contrary to the expectation that functional networks would better represent trait compatibility between bumblebees and plants (Stang *et al.*, 2009; Klumpers *et al.*, 2019). This unexpected pattern could be due to the often generalised nature of pollination networks (Fort *et al.*, 2016), meaning that trait matching might not always be strong. Inclusion of additional functional traits (Pigot *et al.*,



2020), clustering of individuals based on their position in multidimensional trait space (Dehling *et al.*, 2016; Coux *et al.*, 2016), and/or measures of evolutionary history (Bascompte *et al.*, 2019; Hurtado *et al.*, 2020) might improve investigations of how trait compatibility determines the spatiotemporal dynamics of interactive networks.

#### 4.3 The impact of functional group loss on network robustness is spatiotemporally dependent

When simulating bumblebee extinction, removing functional groups from networks led to a faster secondary coextinction of plant species than removing species, especially during the early season at high elevation. This is explained by our functional networks being more connected and less modular, enabling perturbations (species loss) to spread quickly (Kortsch *et al.*, 2015). Functional changes to communities, such as declines in body size, have been shown to accompany environmental change drivers (e.g. Guthrie, 2003; Rode *et al.*, 2010; Wu *et al.*, 2019). Our results suggest that functional group loss may cause faster extinction of interaction partners than based on species loss alone especially given body size overlap was as large within as it was between species. It is plausible to lose whole functional groups, for example, if an early drought disproportionately affected larger bumblebees through reduced floral resources (Couvillon & Dornhaus, 2010) or if a late frost disproportionately affected smaller bees (Heinrich, 1975; Kenna *et al.*, 2021). Studies focusing solely on species loss when investigating how communities may be affected by environmental change (e.g. Burkle *et al.*, 2013; Bascompte *et al.*, 2019; Soroye *et al.*, 2020) may thus underestimate the vulnerability of communities to perturbations.

Bumblebee species removal accelerated the loss of specialised bumblebee-plant interactions relative to functional removal, except during the late season at high elevation, where the reverse occurred. These results highlight the importance of understanding how redundancy varies in time and space. Similarly, Wardle & Zackrisson (2005) found that empirical removal of species or functional groups affected ecosystem-level properties of some islands (in northern Sweden) but not others, depending on historical disturbance regime, island size and successional stage. The spatiotemporal context

dependency of community interactions is thus important to consider when understanding network robustness (Thuiller *et al.*, 2014; Robroek *et al.*, 2017).

Our stepwise modelling approach assumed bumblebee group extinctions could occur randomly. Drivers of extinctions however likely occur and act non-randomly, such as land-use and climate change (Larsen *et al.*, 2005), and thus informing extinction order probabilities will give new insights into rates of co-extinctions. We also assumed bumblebee-plant interactions did not rewire. Although commonly assumed in stepwise-extinction approaches (e.g. Classen *et al.*, 2020; Keyes *et al.*, 2021), this is unlikely in real communities (Brosi & Briggs, 2013; Bramon Mora *et al.*, 2020). However, the lack of plant functional-trait data precluded predictions about which individuals would be sufficiently compatible in their traits to predict rewiring. Additionally, we treated each point in space and time in our extinction analysis as independent and species as independent from functional groups. This overlooks possible temporal autocorrelation in bumblebee biology (i.e. removing (large) queens early in the season could result in fewer (small or large) workers later), and does not consider that relatively large-bodied species could be more negatively affected if a large-bodied functional groups were lost (and vice versa for small-bodied species). To consider these in future analyses, we urge studies to collect trait and interaction data at fine spatiotemporal scales to elucidate mutualist and competitive responses to environmental change.

## 5. CONCLUSION

Our study reinforces why individual traits should be used to construct interaction networks, and the fundamental importance of where and when networks are studied during a season. The impact of functional or taxonomic losses on network robustness was not uniform in space and time, with the rates of plant coextinctions and loss of specialised interactions varying. However, losing bumblebee functional groups typically accelerated plant coextinctions more than losing species, meaning coextinctions of interaction partners could happen more quickly under functional loss than expected

based on pollinator species extinction. Specifically for our study system, the loss of key functional groups dominating the early season and high altitude could be devastating for the whole plant-pollinator community. Overall, the level of redundancy within plant-pollinator community interactions and subsequently network robustness to perturbation is spatiotemporally dependent. Understanding how trait distributions change in localised space and time is thus essential to understanding dynamic population responses to environmental change.

## 6. REFERENCES

- Adams, D.C., Collyer, M.L. & Kaliontzopoulou, A. (2020). Geomorph: Software for geometric morphometric analyses. R package version 3.2.1.
- Bartomeus, I. (2013). Understanding Linkage Rules in Plant-Pollinator Networks by Using Hierarchical Models That Incorporate Pollinator Detectability and Plant Traits. *PLoS One*, 8, e69200.
- Bartomeus, I., Gravel, D., Tylianakis, J.M., Aizen, M.A., Dickie, I.A. & Bernard-Verdier, M. (2016). A common framework for identifying linkage rules across different types of interactions. *Funct. Ecol.*
- Bascompte, J., García, M.B., Ortega, R., Rezende, E.L. & Pironon, S. (2019). Mutualistic interactions reshuffle the effects of climate change on plants across the tree of life. *Sci. Adv.*, 5, eaav2539.
- Bascompte, J. & Jordano, P. (2007). Plant-Animal Mutualistic Networks: The Architecture of Biodiversity. *Annu. Rev. Ecol. Evol. Syst.*, 38, 567–593.
- Baselga, A. (2013). Separating the two components of abundance-based dissimilarity: balanced changes in abundance vs. abundance gradients. *Methods Ecol. Evol.*, 4, 552–557.
- Baselga, A., Orme, D., Villeger, S., De Bortoli, J., Leprieur, F. & Baselga, M.A. (2018). Package ‘betapart.’ *Partitioning beta Divers. Turnover Nestedness Components. Ver*, 1.

446 Bates, D., Maechler, M., Bolker, B., Walker, S., Christensen, R.H.B., Singmann, H., *et al.* (2018).  
 447 Package ‘lme4.’ *Version*, 1, 437.

448 Beckett, S.J. (2016). Improved community detection in weighted bipartite networks. *R. Soc. Open*  
 449 *Sci.*, 3.

450 Bewick, S., Brosi, B.J. & Armsworth, P.R. (2013). Predicting the effect of competition on secondary  
 451 plant extinctions in plant-pollinator networks. *Oikos*, 122, 1710–1719.

452 Bladon, A.J., Lewis, M., Bladon, E.K., Buckton, S.J., Corbett, S., Ewing, S.R., *et al.* (2020). How  
 453 butterflies keep their cool: Physical and ecological traits influence thermoregulatory ability and  
 454 population trends. *J. Anim. Ecol.*, 89, 2440–2450.

455 Bolnick, D.I., Amarasekare, P., Araújo, M.S., Bürger, R., Levine, J.M., Novak, M., *et al.* (2011). Why  
 456 intraspecific trait variation matters in community ecology. *Trends Ecol. Evol.*

457 Boyle, M.J.W., Bishop, T.R., Luke, S.H., van Breugel, M., Evans, T.A., Pfeifer, M., *et al.* (2020).  
 458 Localised climate change defines ant communities in human-modified tropical landscapes.  
 459 *Funct. Ecol.*, 7, 14.

460 Bramon Mora, B., Shin, E., CaraDonna, P.J. & Stouffer, D.B. (2020). Untangling the seasonal dynamics  
 461 of plant-pollinator communities. *Nat. Commun.*, 11, 1–9.

462 Brosi, B.J. & Briggs, H.M. (2013). Single pollinator species losses reduce floral fidelity and plant  
 463 reproductive function. *Proc. Natl. Acad. Sci. U. S. A.*, 110, 13044–13048.

464 Burkle, L.A., Marlin, J.C. & Knight, T.M. (2013). Plant-pollinator interactions over 120 years: Loss of  
 465 species, co-occurrence, and function. *Science (80-. )*, 340, 1611–1615.

466 Cane, J.H. (1987). Estimation of Bee Size Using Intertegular Span (Apoidea). *J. Kansas Entomol. Soc.*,  
 467 60, 145–147.

468 CaraDonna, P.J., Petry, W.K., Brennan, R.M., Cunningham, J.L., Bronstein, J.L., Waser, N.M., *et al.*

469 (2017). Interaction rewiring and the rapid turnover of plant-pollinator networks. *Ecol. Lett.*, 20,  
470 385–394.

471 CaraDonna, P.J. & Waser, N.M. (2020). Temporal flexibility in the structure of plant–pollinator  
472 interaction networks. *Oikos*, 129, 1369–1380.

473 Cariveau, D.P., Nayak, G.K., Bartomeus, I., Zientek, J., Ascher, J.S., Gibbs, J., *et al.* (2016). The  
474 Allometry of Bee Proboscis Length and Its Uses in Ecology. *PLoS One*, 11, e0151482.

475 Cirtwill, A.R., Roslin, T., Rasmussen, C., Olesen, J.M. & Stouffer, D.B. (2018). Between-year changes in  
476 community composition shape species’ roles in an Arctic plant-pollinator network. *Oikos*, 127,  
477 1163–1176.

478 Classen, A., Steffan-Dewenter, I., Kindeketa, W.J. & Peters, M.K. (2017). Integrating intraspecific  
479 variation in community ecology unifies theories on body size shifts along climatic gradients.  
480 *Funct. Ecol.*, 31, 768–777.

481 Couvillon, M.J. & Dornhaus, A. (2010). Small worker bumble bees (*Bombus impatiens*) are hardier  
482 against starvation than their larger sisters. *Insectes Sociaux*, 57, 193–197.

483 Coux, C., Rader, R., Bartomeus, I. & Tylianakis, J.M. (2016). Linking species functional roles to their  
484 network roles. *Ecol. Lett.*, 19, 762–770.

485 Dehling, D.M., Jordano, P., Schaefer, H.M., Böhning-Gaese, K. & Schleuning, M. (2016). Morphology  
486 predicts species’ functional roles and their degree of specialization in plant–Frugivore  
487 interactions. *Proc. R. Soc. B Biol. Sci.*, 283.

488 Dongmo, M.A.K., Bonebrake, T.C., Hanna, R. & Fomena, A. (2018). Seasonal Polyphenism in *Bicyclus*  
489 *dorothea* (Lepidoptera: Nymphalidae) Across Different Habitats in Cameroon. *Environ.*  
490 *Entomol.*, 47, 1601–1608.

491 Dormann, C.F., Frund, J., Bluthgen, N. & Gruber, B. (2009). Indices, Graphs and Null Models:

492 Analyzing Bipartite Ecological Networks. *Open Ecol. J.*, 2, 7–24.

493 Dupont, Y.L., Padrón, B., Olesen, J.M. & Petanidou, T. (2009). Spatio-temporal variation in the  
494 structure of pollination networks. *Oikos*, 118, 1261–1269.

495 Dupont, Y.L., Trøjelsgaard, K., Hagen, M., Henriksen, M. V., Olesen, J.M., Pedersen, N.M.E., *et al.*  
496 (2014). Spatial structure of an individual-based plant-pollinator network. *Oikos*, 123, 1301–  
497 1310.

498 Egas, M., Sabelis, M.W. & Dieckmann, U. (2005). Evolution of specialization and ecological character  
499 displacement of herbivores along a gradient of plant quality. *Evolution (N. Y.)*, 59, 507–520.

500 Eklöf, A., Jacob, U., Kopp, J., Bosch, J., Castro-Urgal, R., Chacoff, N.P., *et al.* (2013). The  
501 dimensionality of ecological networks. *Ecol. Lett.*, 16, 577–583.

502 Fenberg, P.B., Self, A., Stewart, J.R., Wilson, R.J. & Brooks, S.J. (2016). Exploring the universal  
503 ecological responses to climate change in a univoltine butterfly. *J. Anim. Ecol.*, 85, 739–748.

504 Fort, H., Vázquez, D.P. & Lan, B.L. (2016). Abundance and generalisation in mutualistic networks:  
505 solving the chicken-and-egg dilemma. *Ecol. Lett.*, 19, 4–11.

506 Fric, Z.K. & Konvicka, M. (2002). *Generations of the polyphenic butterfly Araschnia levana differ in*  
507 *body design. Evol. Ecol. Res.* Evolutionary Ecology, Ltd.

508 Fries, T.C.E. (1925). The vertical distribution of some plants on Nuolja (Torne Lappmark). *Bot. Not.*,  
509 1925, 205–216.

510 Fukami, T., Martijn Bezemer, T., Mortimer, S.R. & van der Putten, W.H. (2005). Species divergence  
511 and trait convergence in experimental plant community assembly. *Ecol. Lett.*, 8, 1283–1290.

512 Gentile, G., Bonelli, S. & Riva, F. (2021). Evaluating intraspecific variation in insect trait analysis. *Ecol.*  
513 *Entomol.*, 46, 11–18.

514 Germain, R.M., Williams, J.L., Schluter, D. & Angert, A.L. (2018). Moving Character Displacement

515 beyond Characters Using Contemporary Coexistence Theory. *Trends Ecol. Evol.*, 33, 74–84.

516 Gillespie, M.A.K., Birkemoe, T. & Sverdrup-Thygeson, A. (2017). Interactions between body size,  
517 abundance, seasonality, and phenology in forest beetles. *Ecol. Evol.*, 7, 1091–1100.

518 Gómez, J.M., Perfectti, F., Armas, C., Narbona, E., González-Megías, A., Navarro, L., *et al.* (2020).  
519 Within-individual phenotypic plasticity in flowers fosters pollination niche shift. *Nat. Commun.*,  
520 11, 1–12.

521 Gravel, D., Baiser, B., Dunne, J.A., Kopelke, J.-P., Martinez, N.D., Nyman, T., *et al.* (2019). Bringing  
522 Elton and Grinnell together: a quantitative framework to represent the biogeography of  
523 ecological interaction networks. *Ecography (Cop.)*, 42, 401–415.

524 Gray, R.E.J., Ewers, R.M., Boyle, M.J.W., Chung, A.Y.C. & Gill, R.J. (2018). Effect of tropical forest  
525 disturbance on the competitive interactions within a diverse ant community. *Sci. Rep.*, 8, 1–12.

526 Greenleaf, S.S., Williams, N.M., Winfree, R. & Kremen, C. (2007). Bee foraging ranges and their  
527 relationship to body size. *Oecologia*, 153, 589–596.

528 Günter, F., Beaulieu, M., Brunetti, M., Lange, L., Schmitz Ornés, A. & Fischer, K. (2019). Latitudinal  
529 and altitudinal variation in ecologically important traits in a widespread butterfly. *Biol. J. Linn. Soc.*, 128, 742–755.

530

531 Guthrie, RD. (2003). Rapid body size decline in Alaskan Pleistocene horses before extinction. *Nat.*,  
532 426, 169–171.

533 Gutiérrez, D. & Wilson, R.J. (2021). Intra- and interspecific variation in the responses of insect  
534 phenology to climate. *J. Anim. Ecol.*, 90, 248–259.

535 Hagen, M., Kissling, W.D., Rasmussen, C., De Aguiar, M.A.M., Brown, L.E., Carstensen, D.W., *et al.*  
536 (2012). Biodiversity, Species Interactions and Ecological Networks in a Fragmented World. In:  
537 *Advances in Ecological Research*. Academic Press Inc., pp. 89–210.

538 Heinrich, B. (1975). *Thermoregulation in Bumblebees II. Energetics of Warm-up and Free Flight*. J.  
539 *comp. Physiol.* Springer-Verlag.

540 Horne, C.R., Hirst, A.G. & Atkinson, D. (2015). Temperature-size responses match latitudinal-size  
541 clines in arthropods, revealing critical differences between aquatic and terrestrial species. *Ecol.*  
542 *Lett.*, 18, 327–335.

543 Hurtado, P., Prieto, M., Martínez-Vilalta, J., Giordani, P., Aragón, G., López-Angulo, J., *et al.* (2020).  
544 Disentangling functional trait variation and covariation in epiphytic lichens along a continent-  
545 wide latitudinal gradient. *Proc. R. Soc. B Biol. Sci.*, 287.

546 Ings, T.C., Montoya, J.M., Bascompte, J., Blüthgen, N., Brown, L., Dormann, C.F., *et al.* (2009).  
547 Review: Ecological networks - beyond food webs. *J. Anim. Ecol.*, 78, 253–269.

548 Jourdan, J., Krause, S.T., Lazar, V.M., Zimmer, C., Sommer-Trembo, C., Arias-Rodriguez, L., *et al.*  
549 (2016). Shared and unique patterns of phenotypic diversification along a stream gradient in  
550 two congeneric species. *Sci. Rep.*, 6, 1–20.

551 Kaiser-Bunbury, C.N., Valentin, T., Mougai, J., Matatiken, D. & Ghazoul, J. (2011). The tolerance of  
552 island plant-pollinator networks to alien plants. *J. Ecol.*, 99, 202–213.

553 Kenna, D., Pawar, S. & Gill, R.J. (2021). Thermal flight performance reveals impact of warming on  
554 bumblebee foraging potential. *Funct. Ecol.*

555 Keyes, A.A., McLaughlin, J.P., Barner, A.K. & Dee, L.E. (2021). An ecological network approach to  
556 predict ecosystem service vulnerability to species losses. *Nat. Commun.*, 12, 1–11.

557 Klumpers, S.G.T., Stang, M. & Klinkhamer, P.G.L. (2019). Foraging efficiency and size matching in a  
558 plant–pollinator community: the importance of sugar content and tongue length. *Ecol. Lett.*,  
559 22, 469–479.

560 Kortsch, S., Primicerio, R., Fossheim, M., Dolgov, A. V. & Aschan, M. (2015). Climate change alters the



561 structure of arctic marine food webs due to poleward shifts of boreal generalists. *Proc. R. Soc.*  
562 *B Biol. Sci.*, 282.

563 Kuppler, J., Höfers, M.K., Wiesmann, L. & Junker, R.R. (2016). Time-invariant differences between  
564 plant individuals in interactions with arthropods correlate with intraspecific variation in plant  
565 phenology, morphology and floral scent. *New Phytol.*, 210, 1357–1368.

566 Larsen, T.H., Williams, N.M. & Kremen, C. (2005). Extinction order and altered community structure  
567 rapidly disrupt ecosystem functioning. *Ecol. Lett.*, 8, 538–547.

568 Lecoq, L., Ernoult, A. & Mony, C. (2021). Past landscape structure drives the functional assemblages  
569 of plants and birds. *Sci. Rep.*, 11, 3443.

570 Lundberg, H. & Ranta, E. (1980). Habitat and Food Utilization in a Subarctic Bumblebee Community.  
571 *Oikos*, 35, 303.

572 MacDougall, A.S., Caplat, P., Olofsson, J., Siewert, M.B., Bonner, C., Esch, E., *et al.* (2021).  
573 Comparison of the distribution and phenology of Arctic Mountain plants between the early  
574 20th and 21st centuries. *Glob. Chang. Biol.*, 00, 1–14.

575 Maechler, M., Rousseeuw, P., Struyf, A., Hubert, M., Hornik, K., Studer, M., *et al.* (2014). *Package*  
576 *“cluster.”*

577 McCabe, L.M., Cobb, N.S. & Butterfield, B.J. (2019). Environmental filtering of body size and darker  
578 coloration in pollinator communities indicate thermal restrictions on bees, but not flies, at high  
579 elevations. *PeerJ*, 2019, e7867.

580 McGill, B.J., Enquist, B.J., Weiher, E. & Westoby, M. (2006). Rebuilding community ecology from  
581 functional traits. *Trends Ecol. Evol.*, 21, 178–185.

582 Meredith, M. & Ridout, M. (2020). *Overview of the overlap package.*

583 Miller-Struttmann, N.E. & Galen, C. (2014). High-altitude multi-taskers: bumble bee food plant use

584 broadens along an altitudinal productivity gradient. *Oecologia*, 1, 1033–1045.

585 Miller-Struttmann, N.E., Geib, J.C., Franklin, J.D., Kevan, P.G., Holdo, R.M., Ebert-May, D., *et al.*

586 (2015). Functional mismatch in a bumble bee pollination mutualism under climate change.

587 *Science* (80-. ), 349, 1541–1544.

588 Ohler, L.-M., Lechleitner, M. & Junker, R.R. (2020). Microclimatic effects on alpine plant communities

589 and flower-visitor interactions. *Sci. Rep.*, 10, 1–9.

590 Oksanen, J., Kindt, R., Legendre, P., O’Hara, B., Stevens, M.H.H., Oksanen, M.J., *et al.* (2007). The

591 vegan package. *Community Ecol. Packag.*, 10, 719.

592 Olesen, J.M., Bascompte, J., Elberling, H. & Jordano, P. (2008). TEMPORAL DYNAMICS IN A

593 POLLINATION NETWORK. *Ecology*, 89, 1573–1582.

594 Orr, M.C., Hughes, A.C., Chesters, D., Pickering, J., Zhu, C.D. & Ascher, J.S. (2021). Global Patterns

595 and Drivers of Bee Distribution. *Curr. Biol.*, 31, 451-458.e4.

596 Pellissier, L., Albouy, C., Bascompte, J., Farwig, N., Graham, C., Loreau, M., *et al.* (2018). Comparing

597 species interaction networks along environmental gradients. *Biol. Rev.*, 93, 785–800.

598 Peralta, G., Vázquez, D.P., Chacoff, N.P., Lomáscolo, S.B., Perry, G.L.W. & Tylianakis, J.M. (2020). Trait

599 matching and phenological overlap increase the spatio-temporal stability and functionality of

600 plant–pollinator interactions. *Ecol. Lett.*, 23, 1107–1116.

601 Pigot, A.L., Sheard, C., Miller, E.T., Bregman, T.P., Freeman, B.G., Roll, U., *et al.* (2020).

602 Macroevolutionary convergence connects morphological form to ecological function in birds.

603 *Nat. Ecol. Evol.*, 4, 230–239.

604 Pinheiro, J., Bates, D., DebRoy, S., Sarkar, D., Heisterkamp, S., Van Willigen, B., *et al.* (2017). Package

605 ‘nlme.’ *Linear nonlinear Mix. Eff. Model. version*, 3.

606 Poisot, T., Stouffer, D.B. & Kéfi, S. (2016). Describe, understand and predict: why do we need

607 networks in ecology?

608 R Core Team (2020). R: A language and environment for statistical computing. R Foundation for  
609 Statistical Computing, Vienna, Austria. URL <https://www.R-project.org/>.

610 Ranta, E. & Lundberg, H. (1981). Resource utilization by bumblebee queens, workers and males in a  
611 subarctic area. *Ecography (Cop.)*, 4, 145–154.

612 Ridout, M.S. & Linkie, M. (2009). Estimating overlap of daily activity patterns from camera trap data.  
613 *J. Agric. Biol. Environ. Stat.*, 14, 322–337.

614 Robroek, B.J.M., Jassey, V.E.J., Payne, R.J., Martí, M., Bragazza, L., Bleeker, A., *et al.* (2017).  
615 Taxonomic and functional turnover are decoupled in European peat bogs. *Nat. Commun.*, 8, 1–  
616 9.

617 Des Roches, S., Post, D.M., Turley, N.E., Bailey, J.K., Hendry, A.P., Kinnison, M.T., *et al.* (2018). The  
618 ecological importance of intraspecific variation. *Nat. Ecol. Evol.*, 2, 57–64.

619 Rode, K.D., Amstrup, S.C. & Regehr, E. V. (2010). Reduced body size and cub recruitment in polar  
620 bears associated with sea ice decline. *Ecol. Appl.*, 20, 768–782.

621 Rohlf, F.J. (2015). The tps series of software. *Hystrix*, 26, 1–4.

622 Rumeu, B., Sheath, D.J., Hawes, J.E. & Ings, T.C. (2018). Zooming into plant-flower visitor networks:  
623 An individual trait-based approach. *PeerJ*, 2018, e5618.

624 Schroeder, P.J. & Jenkins, D.G. (2018). How robust are popular beta diversity indices to sampling  
625 error? *Ecosphere*, 9, e02100.

626 Siefert, A., Violle, C., Chalmandrier, L., Albert, C.H., Taudiere, A., Fajardo, A., *et al.* (2015). A global  
627 meta-analysis of the relative extent of intraspecific trait variation in plant communities. *Ecol.*  
628 *Lett.*, 18, 1406–1419.

629 Signorell, A. (2021). *DescTools: Tools for Descriptive Statistics*.

630 Söderström, B. (2017). *Sveriges humlor: en fälthandbok*. Entomologiska föreningen i Stockholm.

631 Soroye, P., Newbold, T. & Kerr, J. (2020). Climate change contributes to widespread declines among  
632 bumble bees across continents. *Science (80)*, 367, 685–688.

633 Stang, M., Klinkhamer, P.G.L., Waser, N.M., Stang, I. & van der Meijden, E. (2009). Size-specific  
634 interaction patterns and size matching in a plant–pollinator interaction web. *Ann. Bot.*, 103,  
635 1459–1469.

636 Taylor-Cox, E.D., Macgregor, C.J., Corthine, A., Hill, J.K., Hodgson, J.A. & Saccheri, I.J. (2020). Wing  
637 morphological responses to latitude and colonisation in a range expanding butterfly. *PeerJ*, 8,  
638 e10352.

639 Thuiller, W., Pironon, S., Psomas, A., Barbet-Massin, M., Jiguet, F., Lavergne, S., *et al.* (2014). The  
640 European functional tree of bird life in the face of global change. *Nat. Commun.*, 5, 1–10.

641 Trøjelsgaard, K. & Olesen, J.M. (2016). Ecological networks in motion: micro- and macroscopic  
642 variability across scales. *Funct. Ecol.*

643 Tur, C., Vigalondo, B., Trøjelsgaard, K., Olesen, J.M. & Traveset, A. (2014). Downscaling pollen–  
644 transport networks to the level of individuals. *J. Anim. Ecol.*, 83, 306–317.

645 Tylianakis, J.M. & Morris, R.J. (2017). Ecological Networks Across Environmental Gradients. *Annu.*  
646 *Rev. Ecol. Evol. Syst.*, 48, 25–48.

647 Vázquez, D.P., Melián, C.J., Williams, N.M., Blüthgen, N., Krasnov, B.R. & Poulin, R. (2007). Species  
648 abundance and asymmetric interaction strength in ecological networks. *Oikos*, 116, 1120–1127.

649 Wardle, D.A. & Zackrisson, O. (2005). Effects of species and functional group loss on island  
650 ecosystem properties. *Nat. 2005 4357043*, 435, 806–810.

651 Williams, P.H., Byvaltssev, A.M., Cederberg, B., Berezin, M. V., Ødegaard, F., Rasmussen, C., *et al.*  
652 (2015). Genes suggest ancestral colour polymorphisms are shared across morphologically

cryptic species in arctic bumblebees. *PLoS One*, 10, 1–26.

Wong, M.K.L. & Carmona, C.P. (2021). Including intraspecific trait variability to avoid distortion of functional diversity and ecological inference: Lessons from natural assemblages. *Methods Ecol. Evol.*, 12, 946–957.

Wu, C.-H., Holloway, J.D., Hill, J.K., Thomas, C.D., Chen, I.-C. & Ho, C.-K. (2019). Reduced body sizes in climate-impacted Borneo moth assemblages are primarily explained by range shifts. *Nat. Commun.* 2019 101, 10, 1–7.

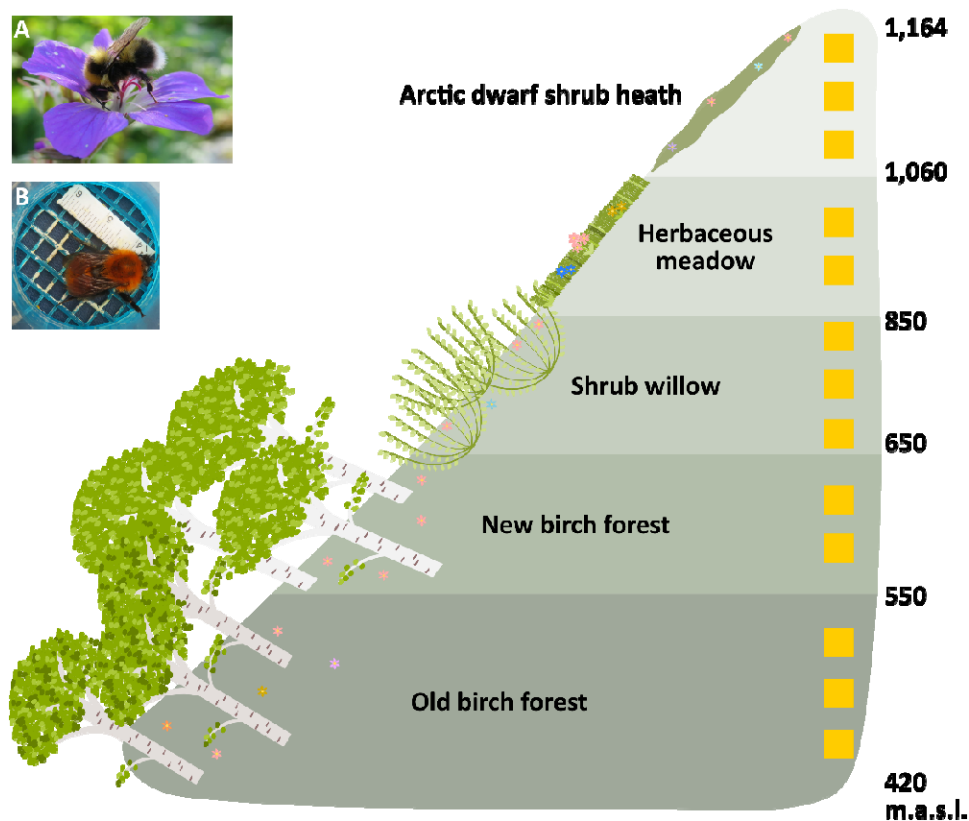

Figure 1: The elevational transect on Mount Nuolja spans five vegetation zones with 13 sampling plots (yellow squares). Diagram not to scale. Inset images show: (A) *Bombus jonellus* foraging on *Geranium sylvaticum*; (B) *B. pascuorum* inside a marking cage for measuring the intertegular distance (photo credits: Olivia Bates, Tara Cox & Aoife Cantwell-Jones).

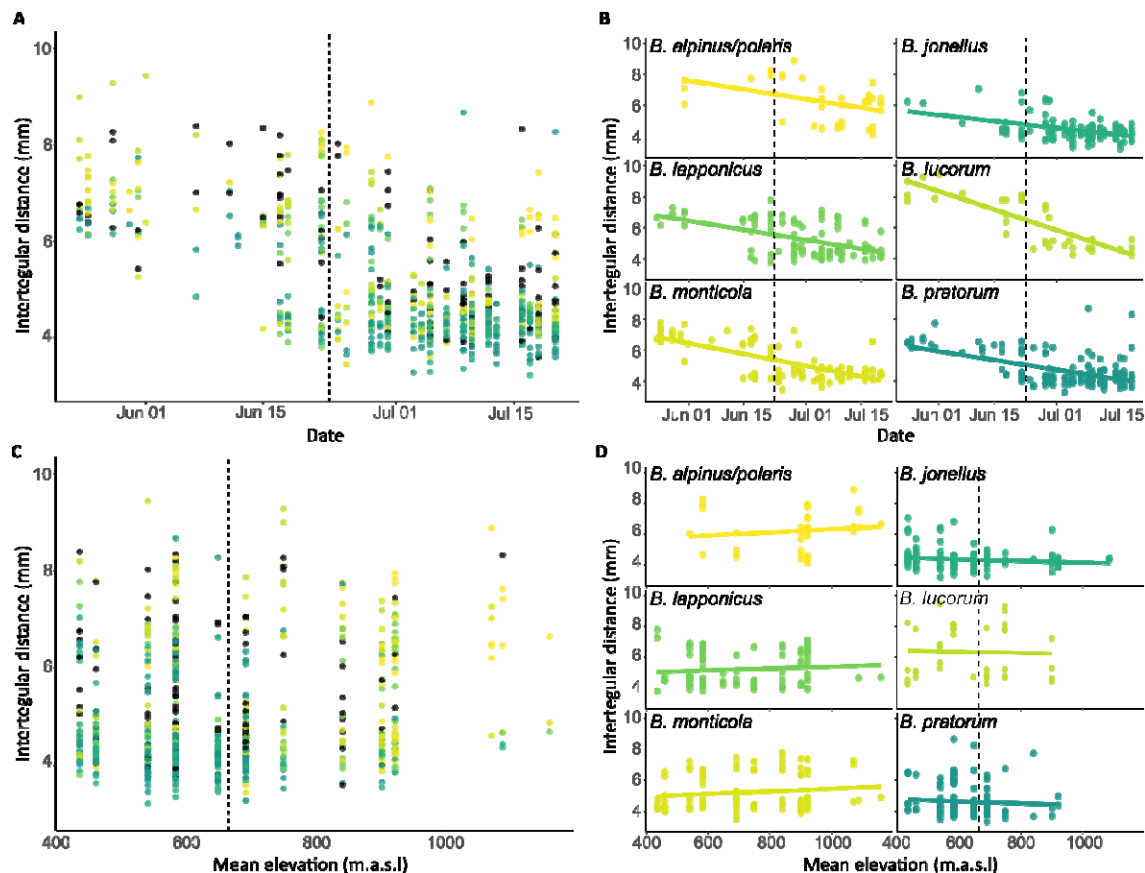

**Figure 2: Body size (ITD) turnover in space and time for the bumblebee community.** Each data point represents a captured individual. Panels A-B show ITD variation as the season progressed at A) the community level and B) for the six most abundant species, with the dashed line depicting the transition from queen- to worker-dominated foraging, based on estimates from a binomial generalised linear model (Table S7). Panels C-D show ITD variation along the elevational gradient at C) the community level and D) for the six most abundant species, with the dashed line depicting the split between assigned low- (left of line) and high- (right) elevation survey plots. The six most abundant species (*Bombus alpinus/polaris*, *B. jonellus*, *B. lapponicus*, *B. lucorum*, *B. monticola* and *B. pratorum*) are colour coded, with the colours in A & C matching those in B & D. The remaining seven species (*B. balteatus*, *B. bohemicus*, *B. cingulatus*, *B. flavidus*, *B. hortorum*, *B. hyperboreus* and *B. pascuorum*) are black in A & C.

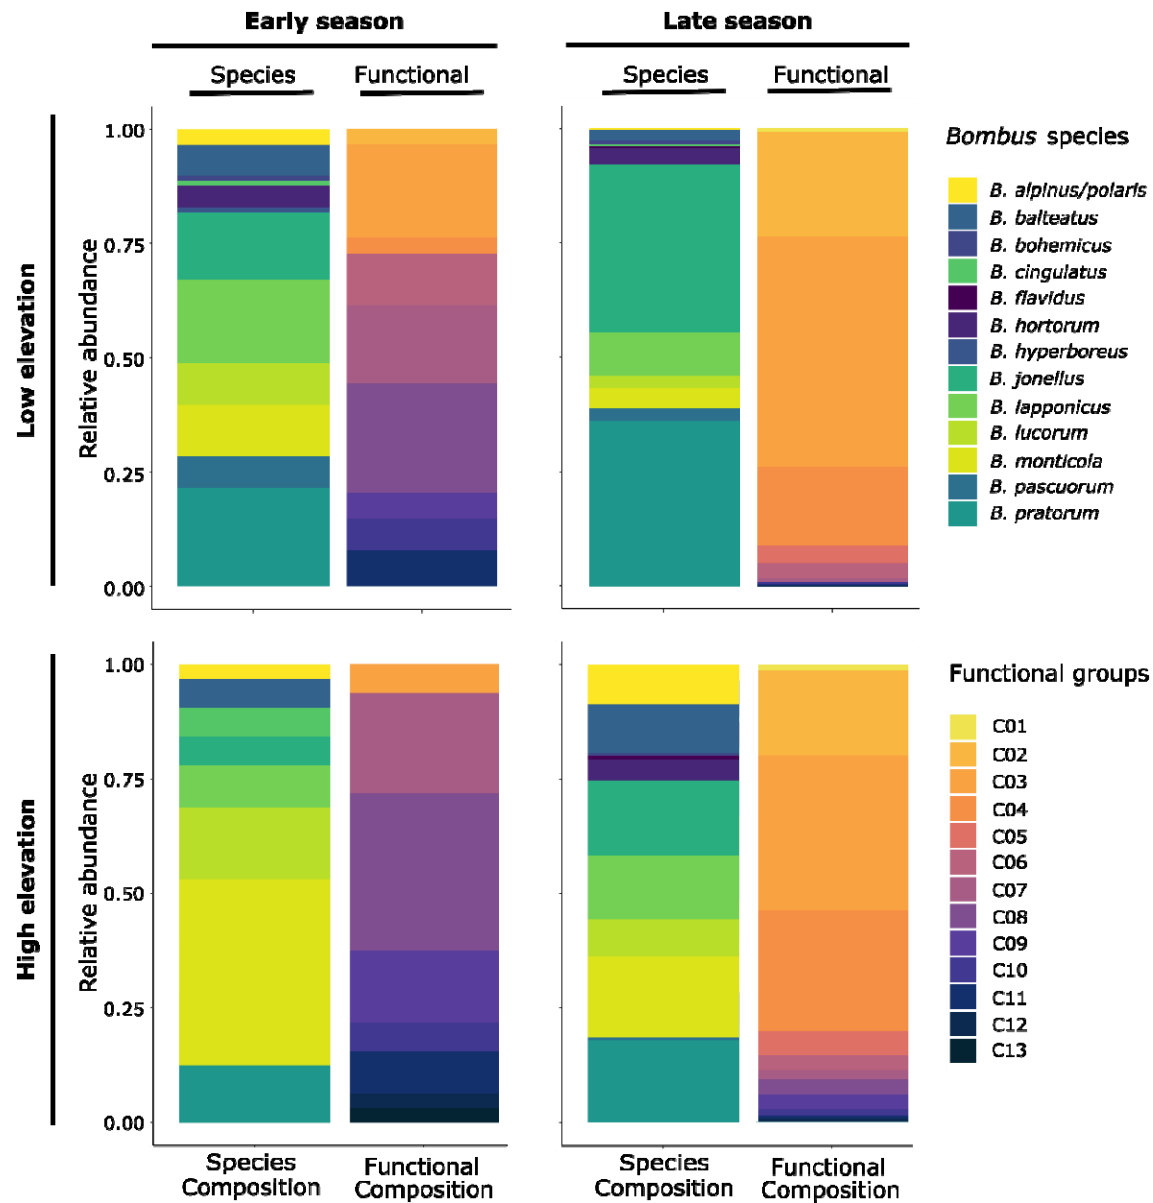

679

680 **Figure 3: Turnover of species- and functional-group-based communities in space (Low & High**  
 681 **elevation) and time (Early & Late season).** The number of individuals in the species- and functional-  
 682 group-based bumblebee communities are the same (early season, low elevation = 88; late, low =  
 683 224; early, high = 32; late, high = 151). Functional groups are numbered from the smallest-bodied  
 684 individuals (C01) to the largest (C13).

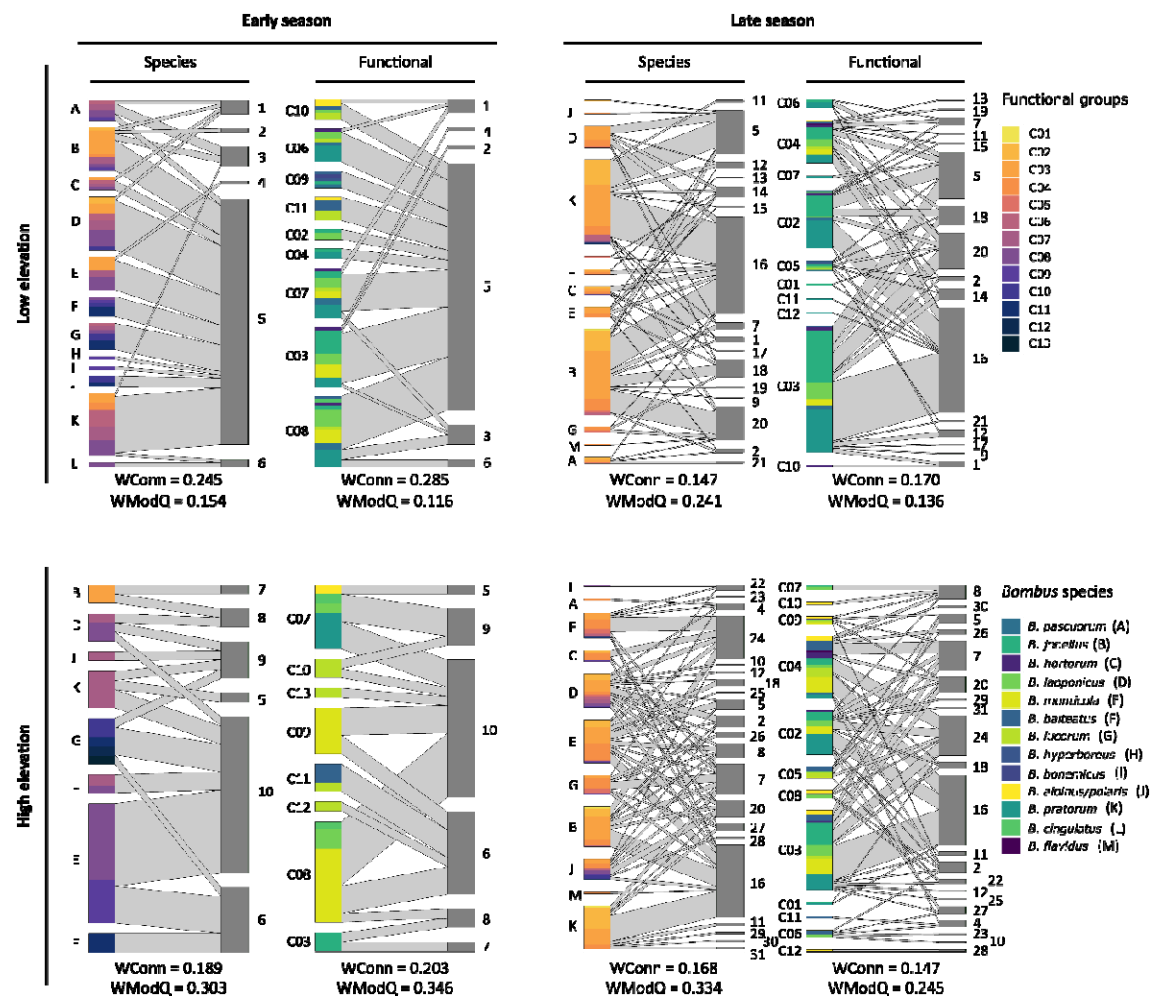

Figure 4: **Species- and functional-group-based bumblebee-plant visitation networks at different points in space and time.** Nodes in grey represent plant species: 1) *Andromeda polifolia*, 2) *Pedicularis lapponica*, 3) *Salix myrsinites*, 4) *Phyllodoce caerulea*, 5) *Vaccinium myrtillus*, 6) *Salix phylicifolia*, 7) *Trollius europaeus*, 8) *Salix glauca*, 9) *Salix myrsinifolia*, 10) *Salix lanata*, 11) *Melampyrum sylvaticum*, 12) *Solidago virgaurea*, 13) *Silene dioica*, 14) *Myosotis decumbens*, 15) *Rubus saxatilis*, 16) *Geranium sylvaticum*, 17) *Linnaea borealis*, 18) *Vaccinium uliginosum*, 19) *Saxifraga aizoides*, 20) *Vaccinium vitis-idaea*, 21) *Melampyrum pratense*, 22) *Taraxacum* spp., 23) *Ranunculus acris*, 24) *Astragalus alpinus*, 25) *Epilobium alsinifolium*, 26) *Pyrola rotundifolia*, 27) *Potentilla crantzii*, 28) *Diapensia lapponica*, 29) *Bartsia alpina*, 30) *Pyrola minor*, and 31) *Viola biflora*. For each bipartite network, the coloured nodes on the left trophic level represent bumblebee groups. For networks in the species column, we show the functional group composition of each species indicated by different colours (C01 representing the smallest-bodied bees and C13 the largest). For the networks in the functional column (where groups of bumblebees are clustered based on ITD similarity), we show the species composition of each functional-group node as indicated by different colours. At the bottom of each network is shown its raw weighted connectance (WConn) and weighted quantitative modularity (WModQ).



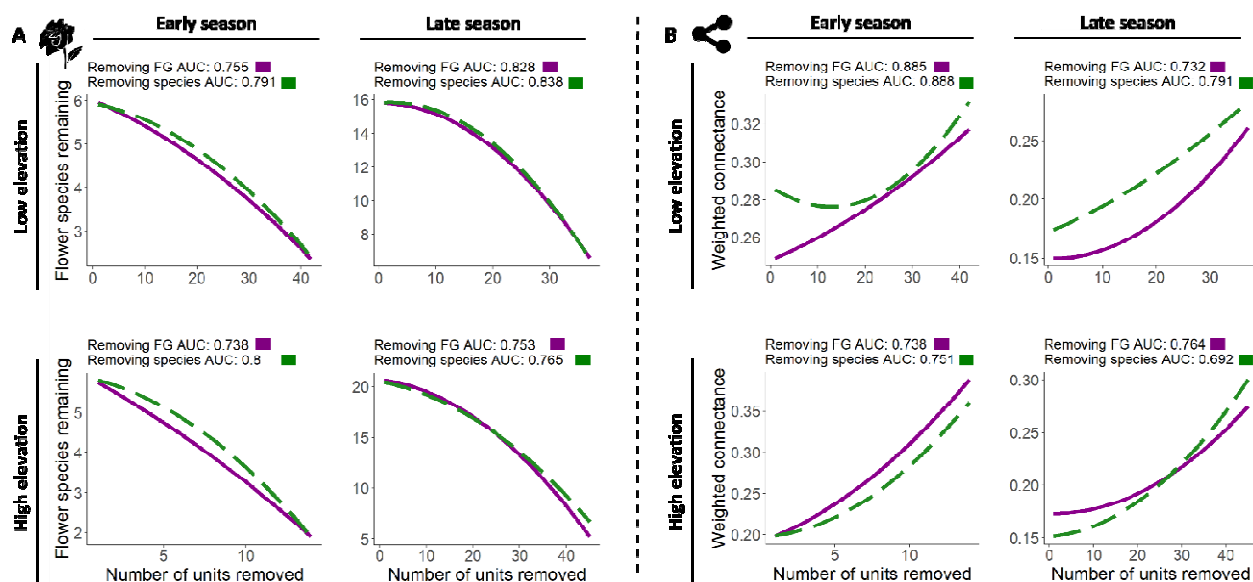

**Figure 5: A) Number of remaining flower species and B) change in weighted connectance, in response to stepwise bumblebee removals to assess network robustness to interaction extinctions.** Simulations randomly removed either species from functional-group nodes (green dashed line) or functional groups from species nodes (purple solid line), for 1,000 iterations. At each random removal, the number of remaining flower species and weighted connectance were calculated (for graphs with raw values, see Figs. S6-9). Standardised area under the curve (AUC) values are given for each plot. A) Higher AUC suggests slower co-extinction of flower species, i.e. greater robustness to extinction. B) Lower AUC suggests delayed loss of specialised interactions (longer time for network to become fully connected), i.e. greater robustness to extinction. FG = functional groups.
